# Supplementary material for: Naked eye detection of arsenite, arsenate, and H2S by a Schiff base naphthaldehyde conjugate using a single paper strip, based on a deprotonation mechanism
Source: Royal Society of Chemistry journal article supplement (doi:10.1039/d4va00213j), 2024-01-01
Supplement: d4va00213j1.pdf [file d4va00213j1.pdf]

## Supporting Information

# Naked eye detection of Arsenite, Arsenate, and H<sub>2</sub>S using a single paper strip, based on deprotonation mechanism by a Schiff base naphthaldehyde conjugate

Diptiman De<sup>a,c</sup>, Priyotosh Ghosh<sup>a</sup>, Sriman De<sup>b</sup> and Prithidipa Sahoo<sup>\*a</sup>

<sup>a</sup>Department of Chemistry, Visva-Bharati University, Santiniketan-731235, India.

<sup>b</sup>Department of Chemical Sciences, Indian Institute of Science Education and Research (IISER) Kolkata, Mohanpur-741246, India.

<sup>c</sup>Department of Chemistry, Gushkara Mahavidyalaya, Guskara- 713128, West Bengal, India.

## Table of Contents

| Entry | Title                                                                                                                                                              | Page No |
|-------|--------------------------------------------------------------------------------------------------------------------------------------------------------------------|---------|
| 1     | Performance comparison of existing methods and present method for detection of AsO <sub>2</sub> <sup>-</sup> , AsO <sub>4</sub> <sup>3-</sup> and H <sub>2</sub> S | S2-S3   |
| 2     | NMR Studies                                                                                                                                                        | S4-S5   |
| 3     | Job's plot of NADNP with AsO <sub>2</sub> <sup>-</sup> and AsO <sub>4</sub> <sup>3-</sup>                                                                          | S6      |
| 4     | Evaluation of the association constants by UV-vis method (NADNP-As <sup>3+</sup> /As <sup>5+</sup> complex)                                                        | S7-S8   |
| 5     | Calculation of limit of detection (LOD) by UV-vis method (NADNP-As <sup>3+</sup> /As <sup>5+</sup> complex)                                                        | S9-S10  |
| 6     | Job's plot of NADNP with H <sub>2</sub> S                                                                                                                          | S11     |
| 7     | Evaluation of the association constants by UV-vis method (NADNP-H <sub>2</sub> S complex)                                                                          | S12     |
| 8     | Calculation of limit of detection (LOD) by UV-vis method (NADNP-H <sub>2</sub> S complex)                                                                          | S13     |
| 9     | pH titration study                                                                                                                                                 | S14     |
| 10    | Partial HRMS of the mixed assay systems                                                                                                                            | S15-S17 |
| 11    | DFT study                                                                                                                                                          | S18-S20 |
| 12    | Quantitative analysis of Arsenite, Arsenate and H <sub>2</sub> S in water sample                                                                                   | S21-S23 |
| 13    | Statistic evaluation of the paper strip                                                                                                                            | S24     |
| 14    | Spiked recovery experiment                                                                                                                                         | S25     |
| 15    | Sensor Sensitivity between solutions and paper strips                                                                                                              | S26     |

# 1. Performance comparison of existing methods and present method for detection of $\text{AsO}_2^-$ , $\text{AsO}_4^{3-}$ and $\text{H}_2\text{S}$ .

**Table S1.** Performance comparison of existing methods and present method for detection of  $\text{AsO}_2^-$  and  $\text{AsO}_4^{3-}$ .

| Sensors                                          | Analytes                                                        | Detection method              | Detection medium                                                  | Sensitivity | Detection limits                          | Estimation | Reference                                                             |
|--------------------------------------------------|-----------------------------------------------------------------|-------------------------------|-------------------------------------------------------------------|-------------|-------------------------------------------|------------|-----------------------------------------------------------------------|
| (2-hydroxy naphthaldehyde conjugated 2,4-DNP)    | $\text{AsO}_2^-$ , $\text{AsO}_4^{3-}$ and $\text{H}_2\text{S}$ | colorimetric                  | DMSO:H <sub>2</sub> O (4:1 v/v, pH 7.0, 10 mM Tris-HCl buffer).   | High        | 0.15 $\mu\text{M}$ and 0.17 $\mu\text{M}$ | Yes        | Present work                                                          |
| RhB molecules                                    | $\text{H}_2\text{AsO}_4^{4-}$ and $\text{HAsO}_4^{2-}$          | fluorometric                  | Aqueous medium                                                    | High        | 10 g/L                                    | Yes        | <i>Sensors and Actuators B.</i> , 2017, <b>241</b> ,1014–1023         |
| benzothiazole Schiff base                        | $\text{As}^{3+}/\text{As}^{5+}$                                 | colorimetric                  | (DMSO:H <sub>2</sub> O ; 1:1, v/v)                                | High        | <7.0 ppb                                  | No         | <i>Anal. Methods</i> , 2017, <b>9</b> , 1779-1785                     |
| 2-((2-hydroxynaphthalen-1-yl)methylene)hydrazine | $\text{AsO}_2^-$ and $\text{CN}^-$                              | Colorimetric and fluorometric | DMF:H <sub>2</sub> O (HEPES buffer of 7.2 pH) (9:1, v/v solution) | High        | 66 nM                                     | Yes        | <i>RSC Adv.</i> , 2016, <b>6</b> , 100136-100144                      |
| 2,6-diformyl-p-cresol with 4-aminoantipyrine     | $\text{AsO}_3^{3-}$                                             | fluorometric                  | HEPES buffer (1 mM, pH 7.4) (DMSO-Water 1:9)                      | High        | 4.12 ppb                                  | No         | <i>Anal. Chem.</i> , 2014, <b>86</b> , 11357–11361                    |
| 5-methyl isatin                                  | $\text{AsO}_2^-$ and $\text{Hg}^{2+}$                           | colorimetric                  | in DMSO                                                           | Modarate    | 10.42 $\mu\text{M}$ for $\text{AsO}_2^-$  | No         | <i>Sensors and Actuators B: Chemical</i> , 2019, <b>284</b> , 271-280 |
| hydrazine-based thiocarbamide                    | $\text{PO}_4^{3-}$ and $\text{AsO}_3^{3-}$                      | Colorimetric and fluorometric | 9:1 v/v Acetonitrile: H <sub>2</sub> O (pH = 7.2)                 | Modarate    | 34 nM                                     | Yes        | <i>New J. Chem.</i> , 2018, <b>42</b> , 6236-6246                     |

**Table S2.** Performance comparison of existing methods and present method for detection of H<sub>2</sub>S.

| Sensors                                                            | Analytes                                                                                           | Detection method              | Detection medium                                                | Sensitivity  | Detection limits    | Estimation | Reference                                                 |
|--------------------------------------------------------------------|----------------------------------------------------------------------------------------------------|-------------------------------|-----------------------------------------------------------------|--------------|---------------------|------------|-----------------------------------------------------------|
| (2-hydroxy naphthaldehyde conjugated 2,4-DNP)                      | H <sub>2</sub> S/S <sup>2-</sup> and AsO <sub>2</sub> <sup>-</sup> /AsO <sub>4</sub> <sup>3-</sup> | colorimetric                  | DMSO:H <sub>2</sub> O (4:1 v/v, pH 7.0, 10 mM Tris-HCl buffer). | High         | 0.17 μM and 0.15 μM | Yes        | Present work                                              |
| 2,3-dihydroxybenzaldehyde and sulfanilamide                        | H <sub>2</sub> S                                                                                   | colorimetric                  | DMSO: Bis-Tris buffer (4:6, 10 mM, pH 7.0)                      | High         | 30 μM               | Yes        | <i>Anal. Methods</i> , 2021, <b>13</b> , 1332             |
| Naminophthalamide and 8-hydroxyjulolidine-9-carboxaldehyde         | Cu <sup>2+</sup> , PO <sub>4</sub> <sup>3-</sup> and S <sup>2-</sup>                               | colorimetric and fluorometric | buffer/DMF solution (3/2, v/v, 10 mM bis-tris, pH = 7.0)        | Low          | —                   | No         | <i>Ind. Eng. Chem. Res.</i> , 2017, <b>56</b> , 8399–8407 |
| 5-(azo-benzene)-Salicylidene-aniline                               | H <sub>2</sub> S                                                                                   | colorimetric and fluorometric | DMSO DMSO-phosphate-buffered saline (PBS) (4:1, v/v, pH 7.4).   | High         | —                   | No         | <i>Luminescence</i> , 2017, <b>32</b> , 765-771           |
| azo-dye based bis-Schiff base                                      | S <sup>2-</sup>                                                                                    | colorimetric and fluorometric | HEPES buffer (10 mL, pH 7.00).                                  | High         | 16 μM               | Yes        | <i>Anal. Methods</i> , 2018, <b>10</b> , 2317-2326        |
| 2-aminoethyl piperazine and 4-chloro-7-nitrobenz-2-oxa-1,3-diazole | H <sub>2</sub> S, Hg <sup>2+</sup>                                                                 | colorimetric                  | bis-tris buffer solution (10 mM, pH 7.0) to                     | Modarate     | —                   | No         | <i>Dalton Trans.</i> , 2016, <b>45</b> , 5700-5712        |
| Dabsyl based                                                       | H <sub>2</sub> S, Hg <sup>2+</sup>                                                                 | colorimetric                  | HEPES-CH <sub>3</sub> CN buffer.                                | colorimetric | 28 mM               | No         | <i>ChemistryS elect</i> , 2016, <b>1</b> ,1533-1540       |
| 4-(piperidin-1-yl) naphthalene-1,2-dione                           | H <sub>2</sub> S                                                                                   | colorimetric and fluorometric | CH <sub>3</sub> CN: HEPES buffer (50:50, v:v, pH-7.4)           | High         | 0.77 μM             | No         | <i>Org. Biomol. Chem.</i> , 2016, <b>14</b> , 570-576     |
| 2-hydroxy-1-naphthylaldehyde                                       | H <sub>2</sub> S/HS <sup>-</sup>                                                                   | colorimetric and fluorometric | CH <sub>3</sub> CN:HEPES buffer solution                        | High         | 1.67 μM             | No         | <i>New J. Chem.</i> , 2015, <b>39</b> , 5669-5675         |

## 2. NMR Studies

### <sup>1</sup>H NMR of NADNP in DMSO-d<sub>6</sub>:

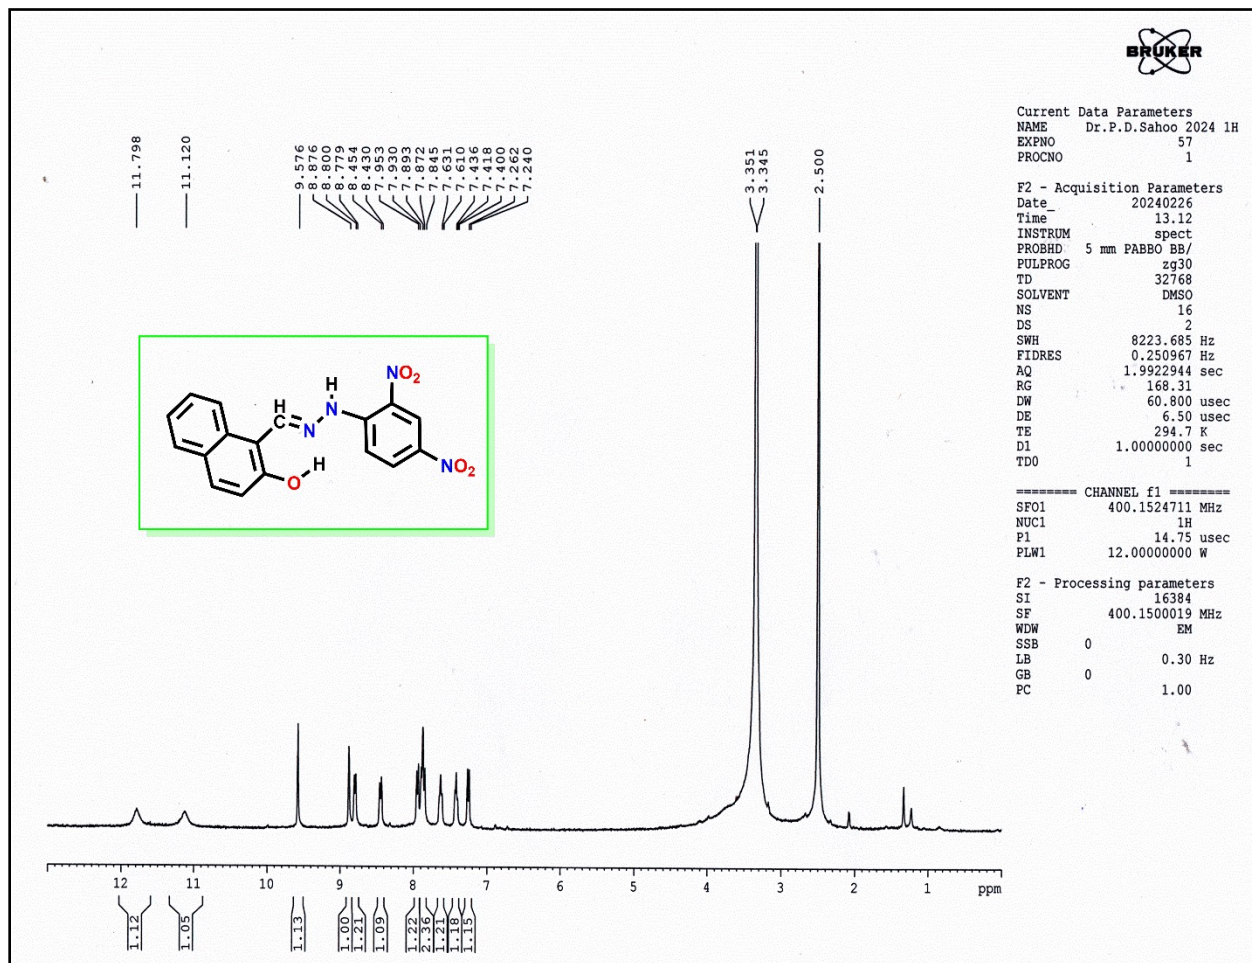

Fig. S1 <sup>1</sup>H NMR of NADNP in DMSO-d<sub>6</sub> (400 MHz).

<sup>13</sup>C NMR of NADNP in DMSO-d<sub>6</sub> :

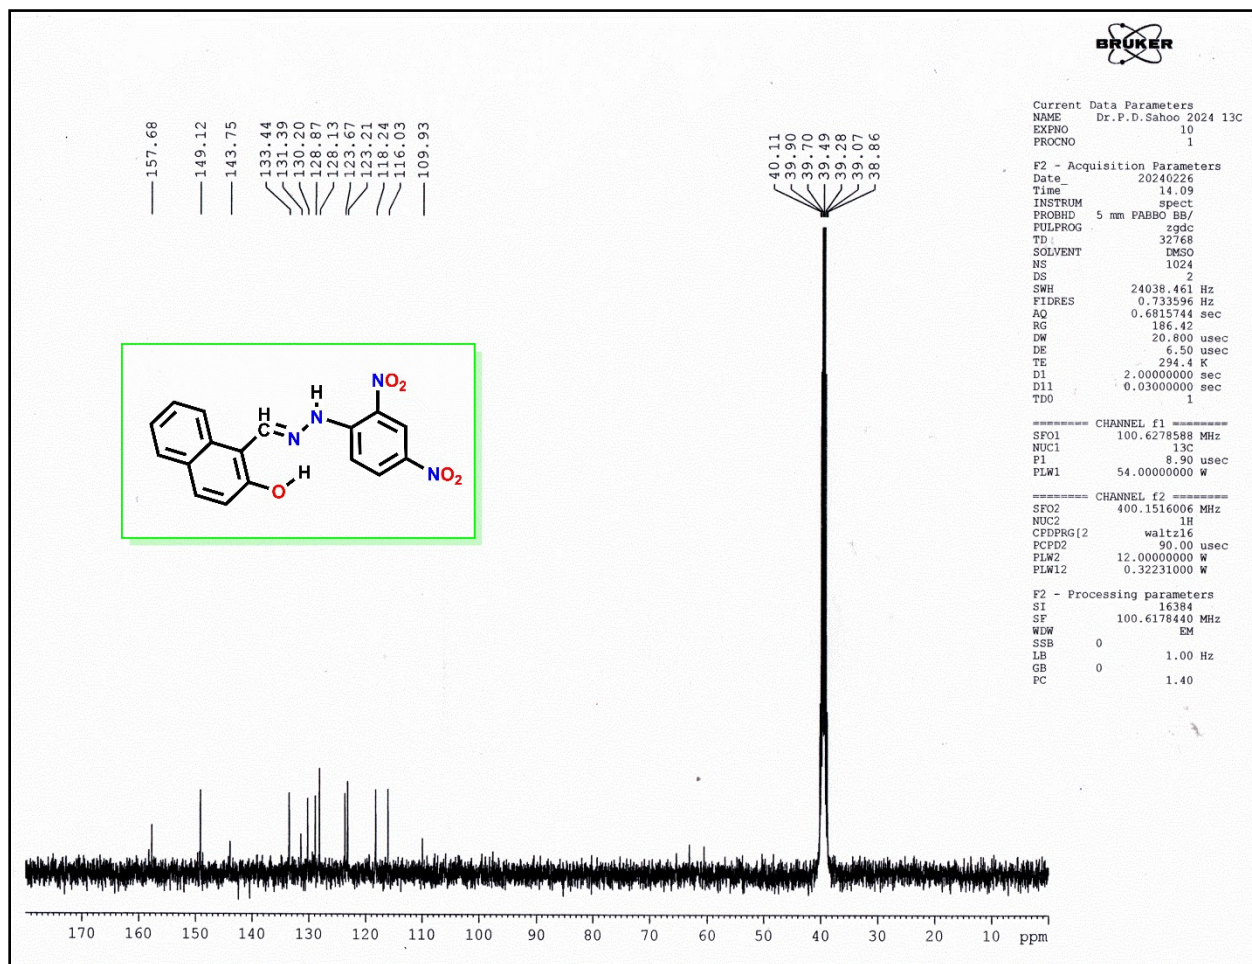

Fig. S2 <sup>13</sup>C NMR of NADNP in DMSO-d<sub>6</sub> (100 MHz).

### 3. Job's plot of NADNP with $\text{AsO}_2^-$ and $\text{AsO}_4^{3-}$ .

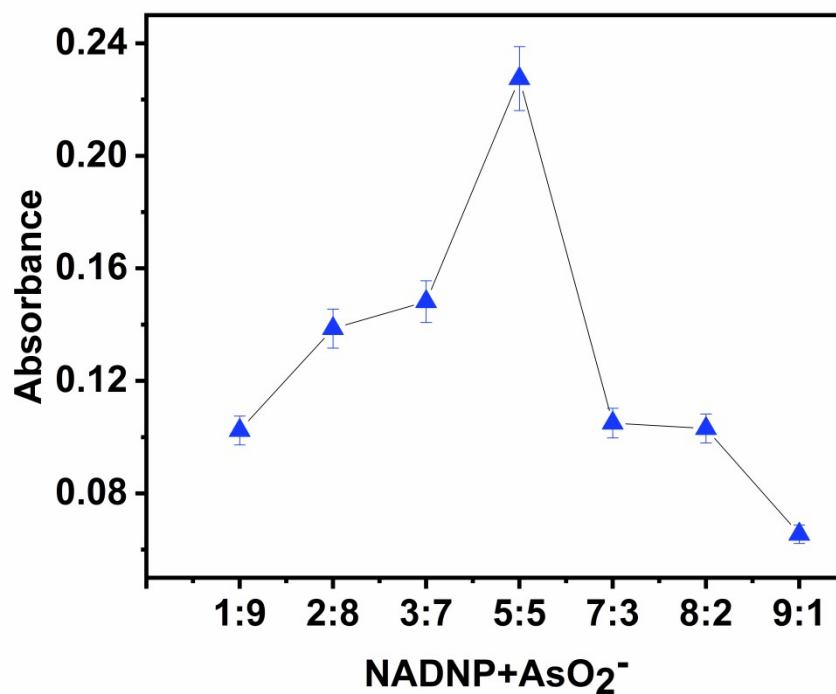

**Fig. S3** Job's plot of NADNP (100 μM) with  $\text{AsO}_2^-$  (100 μM) in DMSO, at neutral pH, by UV-vis method (at 519 nm), which indicate 1:1 stoichiometry for NADNP with  $\text{AsO}_2^-$ . Standard deviations are represented by error bar (n=3).

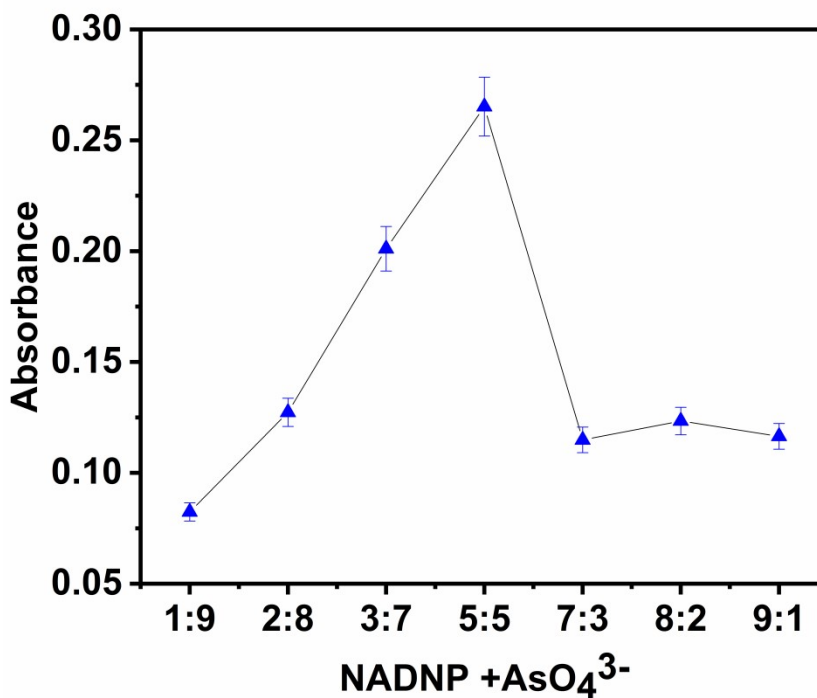

**Fig. S4** Job's plot of NADNP (100 μM) with  $\text{AsO}_4^{3-}$  (100 μM) in DMSO, at neutral pH, by UV-vis method (at 515 nm), which indicate 1:1 stoichiometry for NADNP with  $\text{AsO}_4^{3-}$ . Standard deviations are represented by error bar (n=3).



#### 4. Evaluation of the association constants by UV-vis method (NADNP-As<sup>3+</sup>/As<sup>5+</sup> complex):

##### a) Determination of the association constants for the formation of NADNP-As<sup>3+</sup> complex:

Association constant was calculated according to the Benesi-Hildebrand equation.  $K_a$  was calculated following the equation stated below.

$$1/(A-A_0) = 1/\{K(A_{\max}-A_0) [G]^n\} + 1/[A_{\max}-A_0]$$

Here,  $A_0$  is the absorbance of receptor in the absence of guest,  $A$  is the absorbance recorded in the presence of added guest,  $A_{\max}$  is absorbance in presence of added  $[G]_{\max}$  and  $K_a$  is the association constant, where  $[G]$  is  $[\text{AsO}_2^-]$ . The association constant ( $K_a$ ) could be determined from the slope of the straight line of the plot of  $1/(A-A_0)$  against  $1/[\text{AsO}_2^-]$  and is found to be:

##### Binding constant calculation graph (UV-vis method):

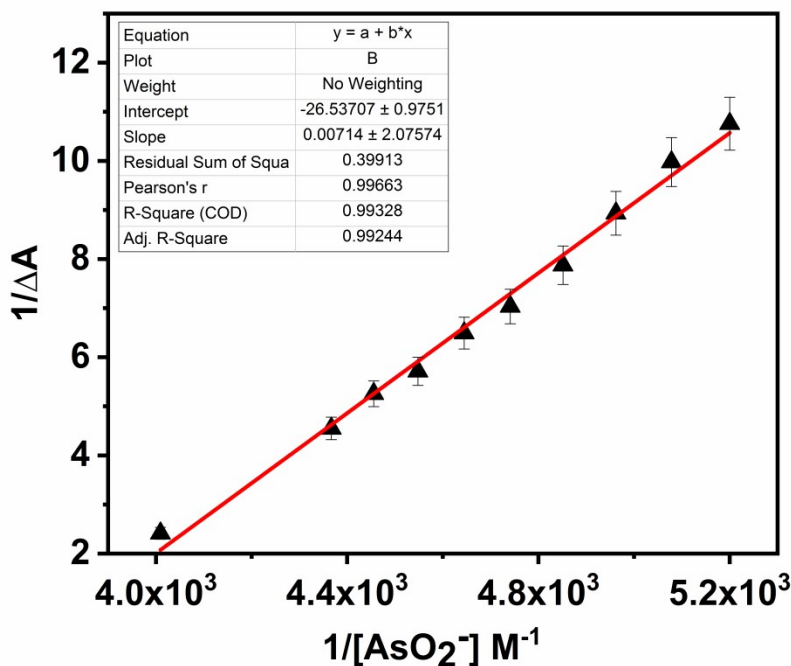

**Fig. S5** Linear regression analysis ( $1/[G]$  vs  $1/\Delta A$ ) for the calculation of association constant value by UV-vis titration method. Standard deviations are represented by error bar ( $n=3$ ).

The association const. ( $K_a$ ) of NADNP for sensing  $\text{AsO}_2^-$  was determined from the equation:  $K_a = \text{intercept}/\text{slope}$ . From the linear fit graph, we get intercept = -26.53707, slope = 0.00714. Thus, we get,  $K_a = 26.53707/0.00714 = 3.7 \times 10^3 \text{ M}^{-1}$ .

## b) Determination of the association constants for the formation of NADNP-As<sup>5+</sup> complex:

Association constant was calculated according to the Benesi-Hildebrand equation.  $K_a$  was calculated following the equation stated below.

$$1/(A-A_0) = 1/\{K(A_{\max}-A_0) [G]^n\} + 1/[A_{\max}-A_0]$$

Here,  $A_0$  is the absorbance of receptor in the absence of guest,  $A$  is the absorbance recorded in the presence of added guest,  $A_{\max}$  is absorbance in presence of added  $[G]_{\max}$  and  $K_a$  is the association constant, where  $[G]$  is  $[\text{AsO}_4^{3-}]$ . The association constant ( $K_a$ ) could be determined from the slope of the straight line of the plot of  $1/(A-A_0)$  against  $1/[\text{AsO}_4^{3-}]$  and is found to be:

### Binding constant calculation graph (UV-vis method):

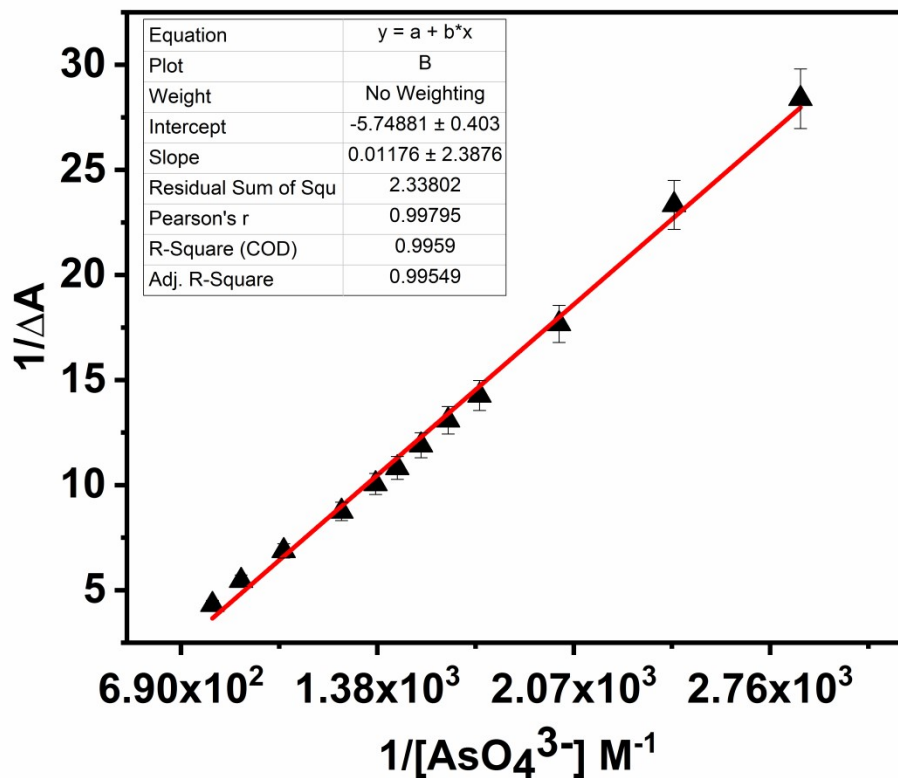

**Fig. S6** Linear regression analysis ( $1/[G]$  vs  $1/\Delta A$ ) for the calculation of association constant value by UV-vis titration method. Standard deviations are represented by error bar ( $n=3$ ).

The association const. ( $K_a$ ) of NADNP for sensing  $\text{AsO}_4^{3-}$  was determined from the equation:  $K_a = \text{intercept}/\text{slope}$ . From the linear fit graph, we get intercept =  $-5.74881$ , slope =  $0.01176$ . Thus, we get,  $K_a = 5.74881/0.01176 = 4.9 \times 10^2 \text{ M}^{-1}$ .



## 5. Calculation of limit of detection (LOD) by UV-vis method (NADNP-As<sup>3+</sup>/As<sup>5+</sup> complex):

### a) Limit of detection (LOD) NADNP with As<sup>3+</sup>:

The detection limit of the chemosensor NADNP for AsO<sub>2</sub><sup>-</sup> was calculated on the basis of UV-vis method. To determine the standard deviation for the absorbance, the absorbance of four individual receptors without AsO<sub>2</sub><sup>-</sup> was measured by 10 times and the standard deviation of blank measurements was calculated. The limit of detection (LOD) of NADNP for sensing AsO<sub>2</sub><sup>-</sup> was determined from the following equation<sup>2-3</sup>:

$$\text{LOD} = K \times \text{SD}/S$$

Where K = 2 or 3 (we take 3 in this case); SD is the standard deviation of the blank receptor solution; S is the slope of the calibration curve.

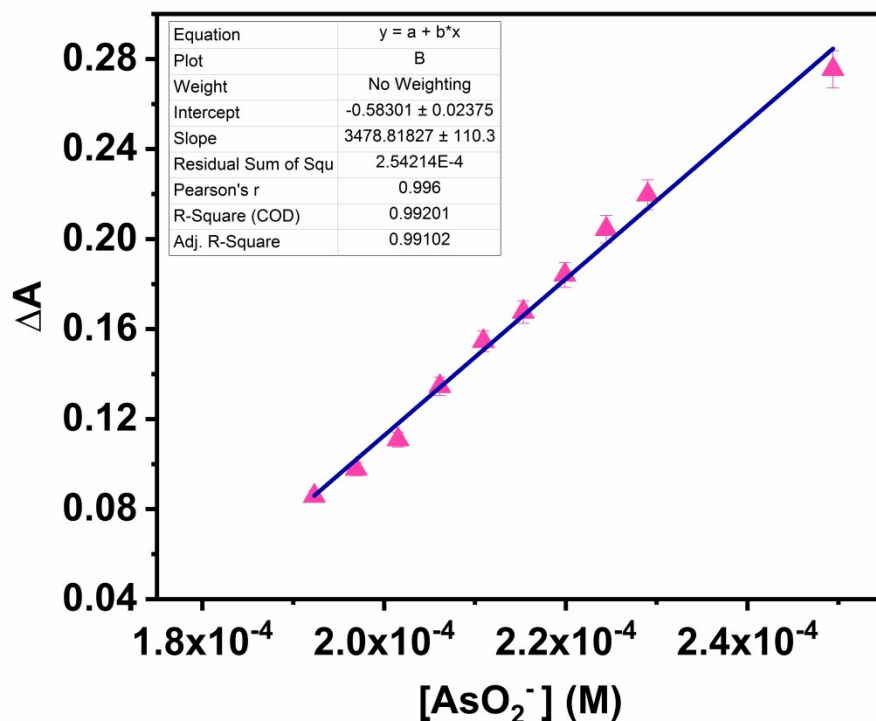

**Fig. S8** Linear fit curve of NADNP at 519 nm with respect to AsO<sub>2</sub><sup>-</sup> concentration. Standard deviations are represented by error bar (n=3).

### For NADNP with As<sup>3+</sup>:

From the linear fit graph, we get slope = 3478.81827, and SD value is 0.0001.

Thus, using the above formula, we get the Limit of Detection =  $1.5 \times 10^{-7}$  M (0.15 μM). Therefore, NADNP can detect AsO<sub>2</sub><sup>-</sup> up to this very lower concentration by UV-vis method.

### b) Limit of detection (LOD) NADNP with As<sup>5+</sup>:

The detection limit of the chemosensor NADNP for AsO<sub>4</sub><sup>3-</sup> was calculated on the basis of UV-vis method. To determine the standard deviation for the absorbance, the absorbance of four individual receptors without AsO<sub>4</sub><sup>3-</sup> was measured by 10 times and the standard deviation of blank measurements was calculated. The limit of detection (LOD) of NADNP for sensing AsO<sub>4</sub><sup>3-</sup> was determined from the following equation<sup>2-3</sup>:

$$\text{LOD} = K \times \text{SD}/S$$

Where K = 2 or 3 (we take 3 in this case); SD is the standard deviation of the blank receptor solution; S is the slope of the calibration curve.

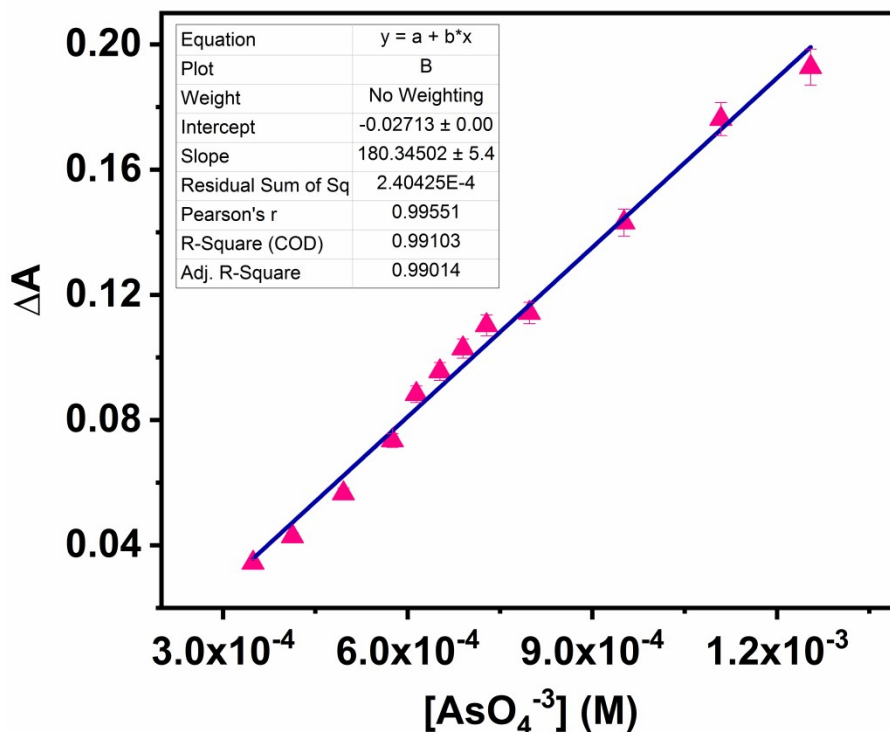

**Fig. S7** Linear fit curve of NADNP at 519 nm with respect to AsO<sub>4</sub><sup>3-</sup> concentration. Standard deviations are represented by error bar (n=3).

#### For NADNP with As<sup>5+</sup>:

From the linear fit graph, we get slope = 180.34502, and SD value is 0.00010.

Thus, using the above formula, we get the Limit of Detection =  $1.5 \times 10^{-7}$  M (0.15 μM). Therefore, NADNP can detect AsO<sub>4</sub><sup>3-</sup> up to this very lower concentration by UV-vis method.

## 6. Job's plot of NADNP with H<sub>2</sub>S.

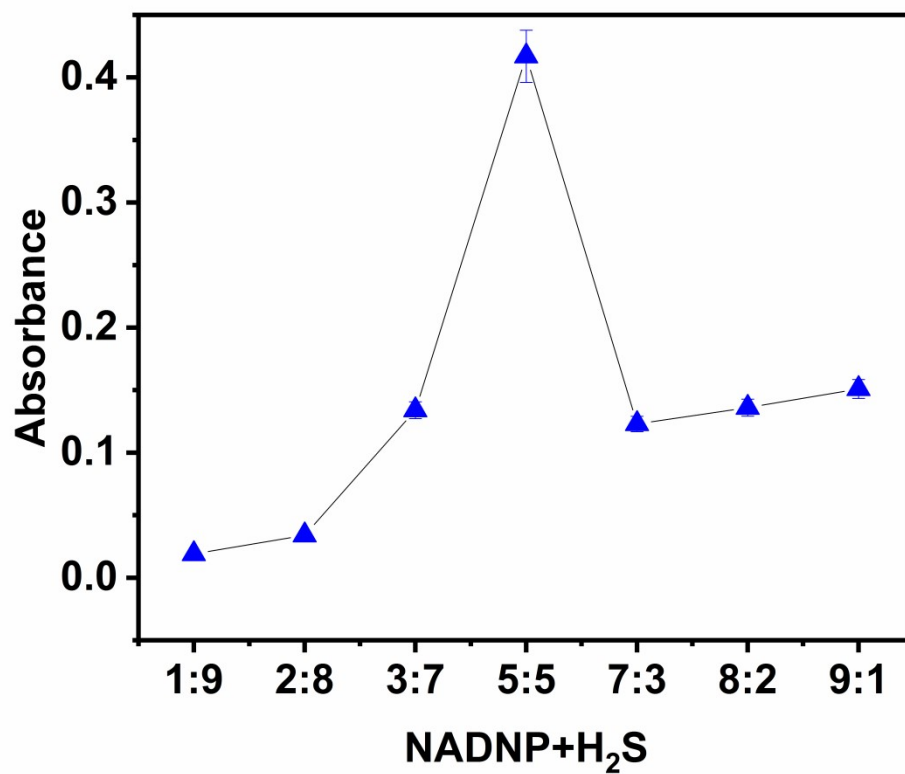

**Fig. S9** Job's plot of NADNP (100  $\mu$ M) with H<sub>2</sub>S (100  $\mu$ M) in DMSO, at neutral pH, by UV-Vis method (at 519 nm), which indicate 1:1 stoichiometry for NADNP with H<sub>2</sub>S. Standard deviations are represented by error bar (n=3).

## 7. Evaluation of the association constants by UV-vis method (NADNP-H<sub>2</sub>S complex):

### Determination of the association constants for the formation of NADNP-H<sub>2</sub>S complex:

Association constant was calculated according to the Benesi-Hildebrand equation.  $K_a$  was calculated following the equation stated below.

$$1/(A-A_0) = 1/\{K(A_{\max}-A_0) [G]^n\} + 1/[A_{\max}-A_0]$$

Here,  $A_0$  is the absorbance of receptor in the absence of guest,  $A$  is the absorbance recorded in the presence of added guest,  $A_{\max}$  is absorbance in presence of added  $[G]_{\max}$  and  $K_a$  is the association constant, where  $[G]$  is  $[H_2S]$ . The association constant ( $K_a$ ) could be determined from the slope of the straight line of the plot of  $1/(A-A_0)$  against  $1/[H_2S]$  and is found to be:

### Binding constant calculation graph (UV-vis method):

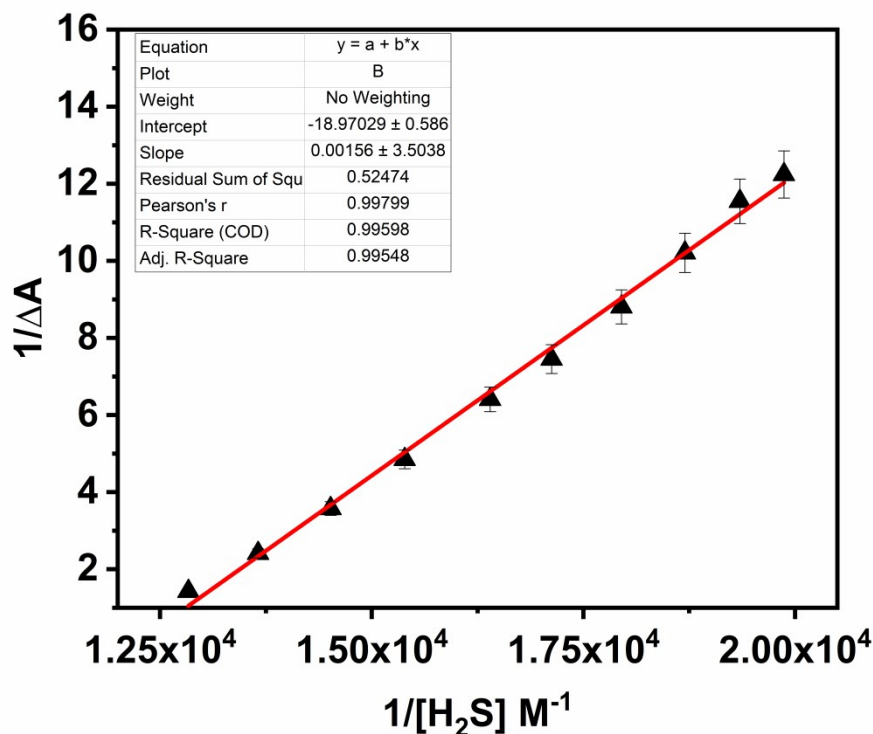

**Fig. S10** Linear regression analysis ( $1/[G]$  vs  $1/\Delta A$ ) for the calculation of association constant value by UV-vis titration method. Standard deviations are represented by error bar ( $n=3$ ).

The association const. ( $K_a$ ) of NADNP for sensing  $H_2S$  was determined from the equation:  $K_a = \text{intercept/slope}$ . From the linear fit graph, we get intercept = 18.97029, slope = 0.00156. Thus, we get,  $K_a = 18.97029/0.00156 = 1.2 \times 10^4 M^{-1}$ .

## 8. Calculation of limit of detection (LOD) by UV-vis method (NADNP-H<sub>2</sub>S complex):

### Limit of detection (LOD) NADNP with H<sub>2</sub>S:

The detection limit of the chemosensor NADNP for H<sub>2</sub>S was calculated on the basis of UV-vis method. To determine the standard deviation for the absorbance, the absorbance of four individual receptors without H<sub>2</sub>S was measured by 10 times and the standard deviation of blank measurements was calculated. The limit of detection (LOD) of NADNP for sensing H<sub>2</sub>S was determined from the following equation<sup>2-3</sup>:

$$\text{LOD} = K \times \text{SD}/S$$

Where K = 2 or 3 (we take 3 in this case); SD is the standard deviation of the blank receptor solution; S is the slope of the calibration curve.

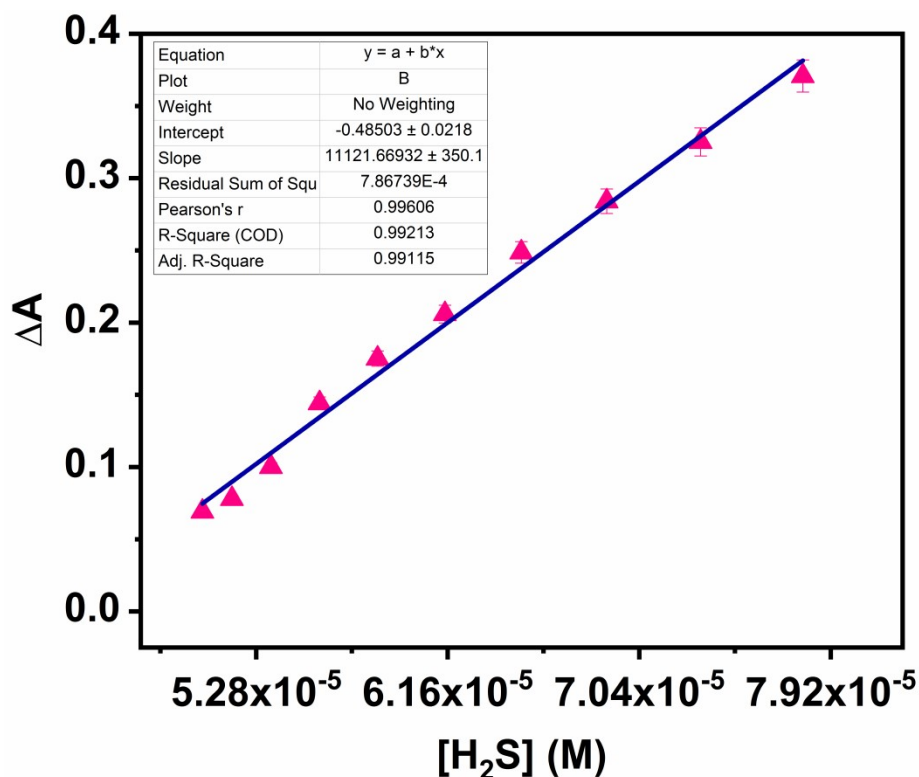

**Fig. S11** Linear fit curve of NADNP at 519 nm with respect to H<sub>2</sub>S concentration. Standard deviations are represented by error bar (n=3).

### For NADNP with H<sub>2</sub>S:

From the linear fit graph, we get slope = 11121.66932, and SD value is 0.0004.

Thus, using the above formula, we get the Limit of Detection =  $1.7 \times 10^{-7}$  M (0.17 μM). Therefore, NADNP can detect H<sub>2</sub>S up to this very lower concentration by UV-vis method.

## 9. pH titration study:

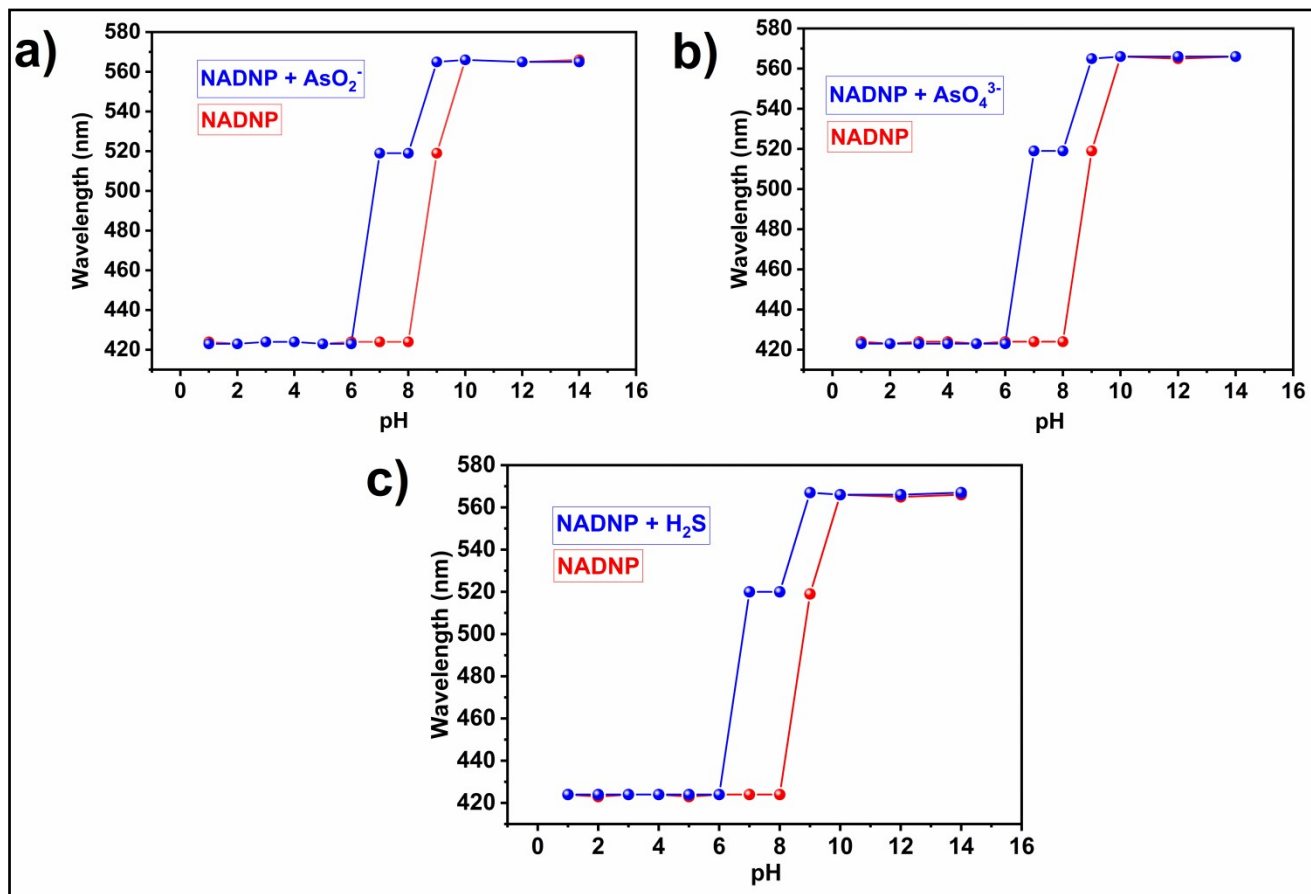

**Fig. S12** a) Effect of pH on the wavelength of NADNP ( $10^{-5}$  M) in the absence of  $\text{AsO}_2^-$  (redline) and in the presence of  $\text{AsO}_2^-$  ( $5 \times 10^{-3}$  M, blue line). b) Effect of pH on the wavelength of NADNP ( $10^{-5}$  M) in the absence of  $\text{AsO}_4^{3-}$  (redline) and in the presence of  $\text{AsO}_4^{3-}$  ( $5 \times 10^{-3}$  M, blue line). c) Effect of pH on the wavelength of NADNP ( $10^{-5}$  M) in the absence of  $\text{H}_2\text{S}$  (redline) and in the presence of  $\text{H}_2\text{S}$  ( $10^{-3}$  M, blue line).

## 10. Partial HRMS of the mixed assay systems:

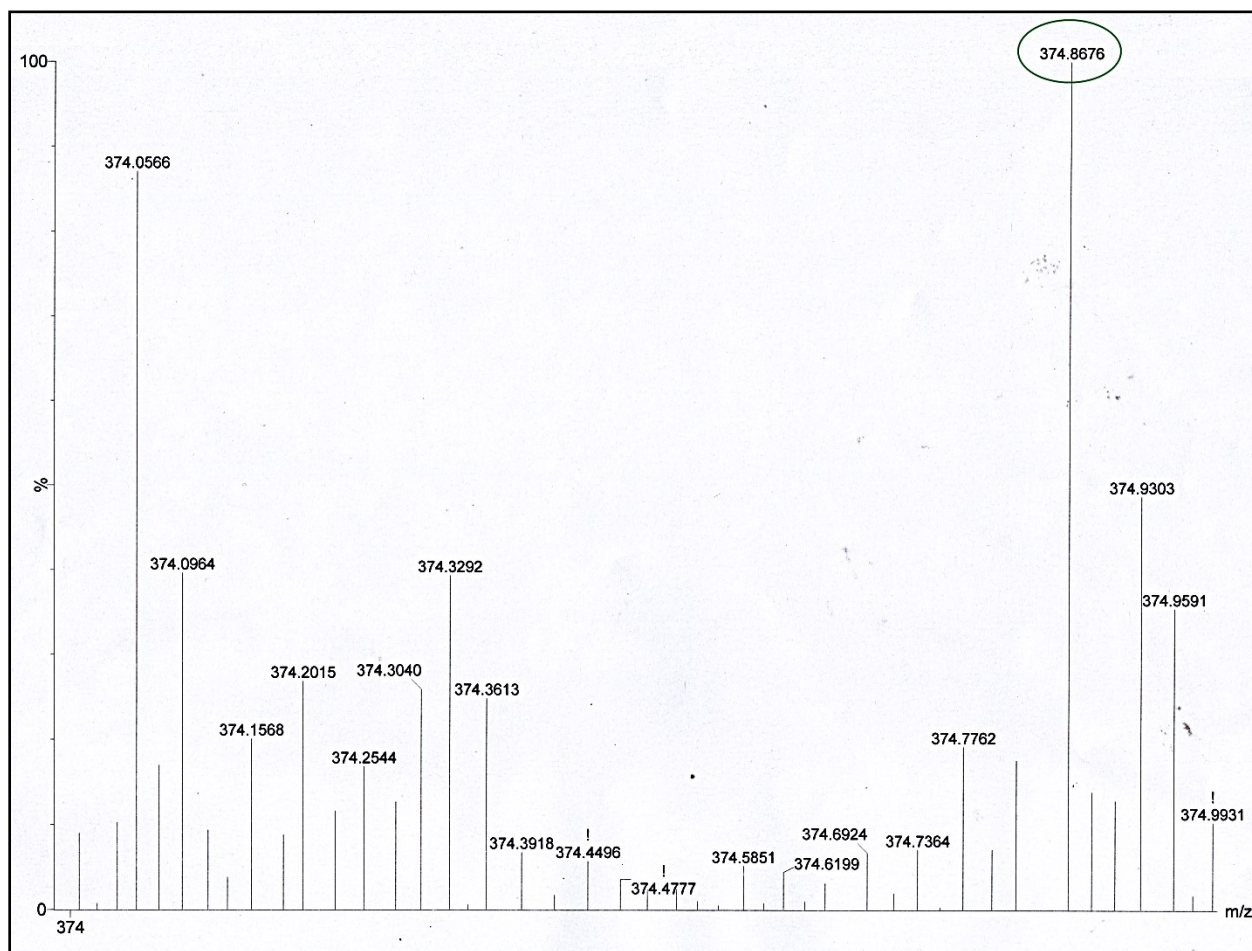

Fig. S13 Partial HRMS spectra of NADNP with  $\text{AsO}_2^-$  in MeOH.



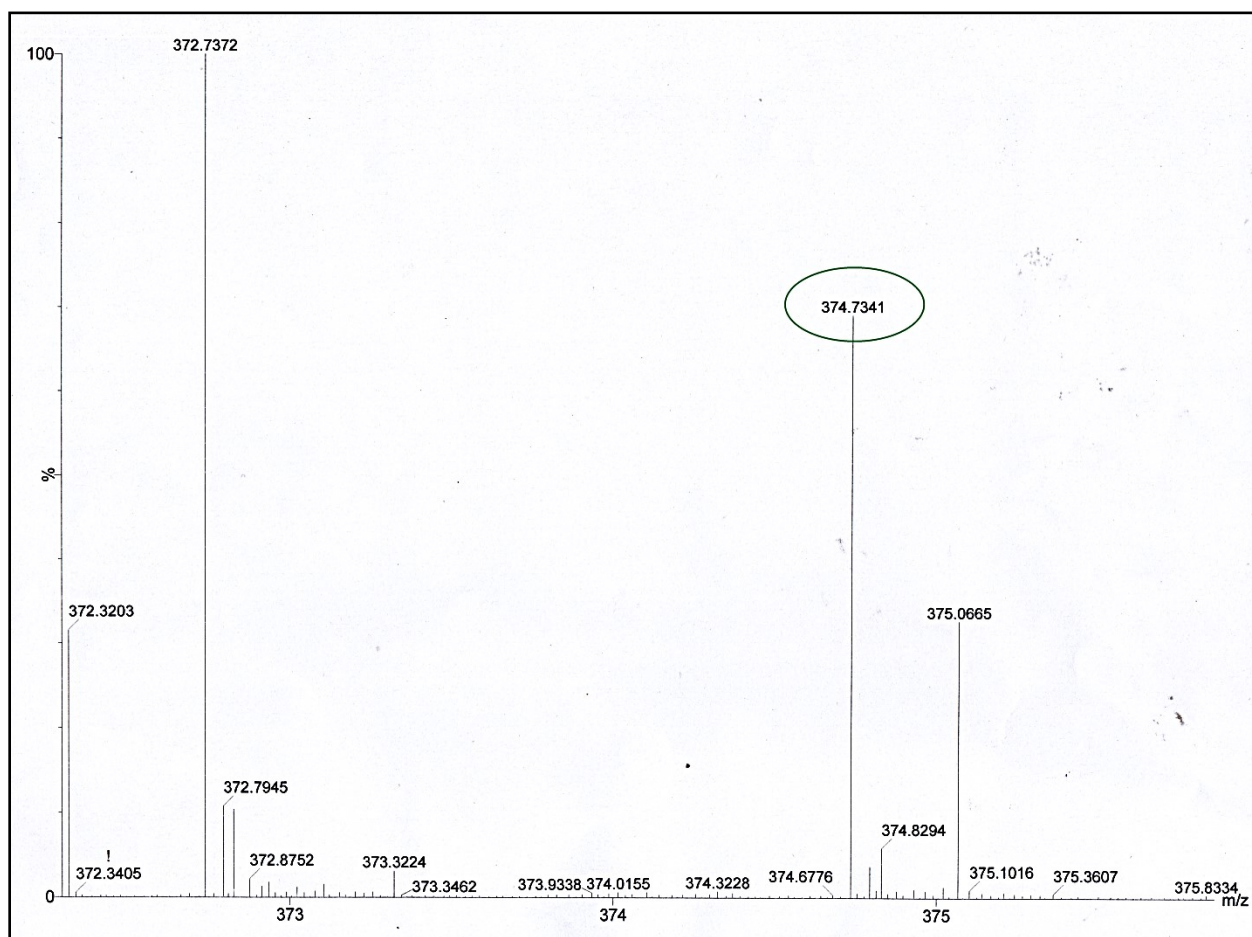

Fig. S14 Partial HRMS spectra of NADNP with  $\text{AsO}_4^{3-}$  in MeOH.

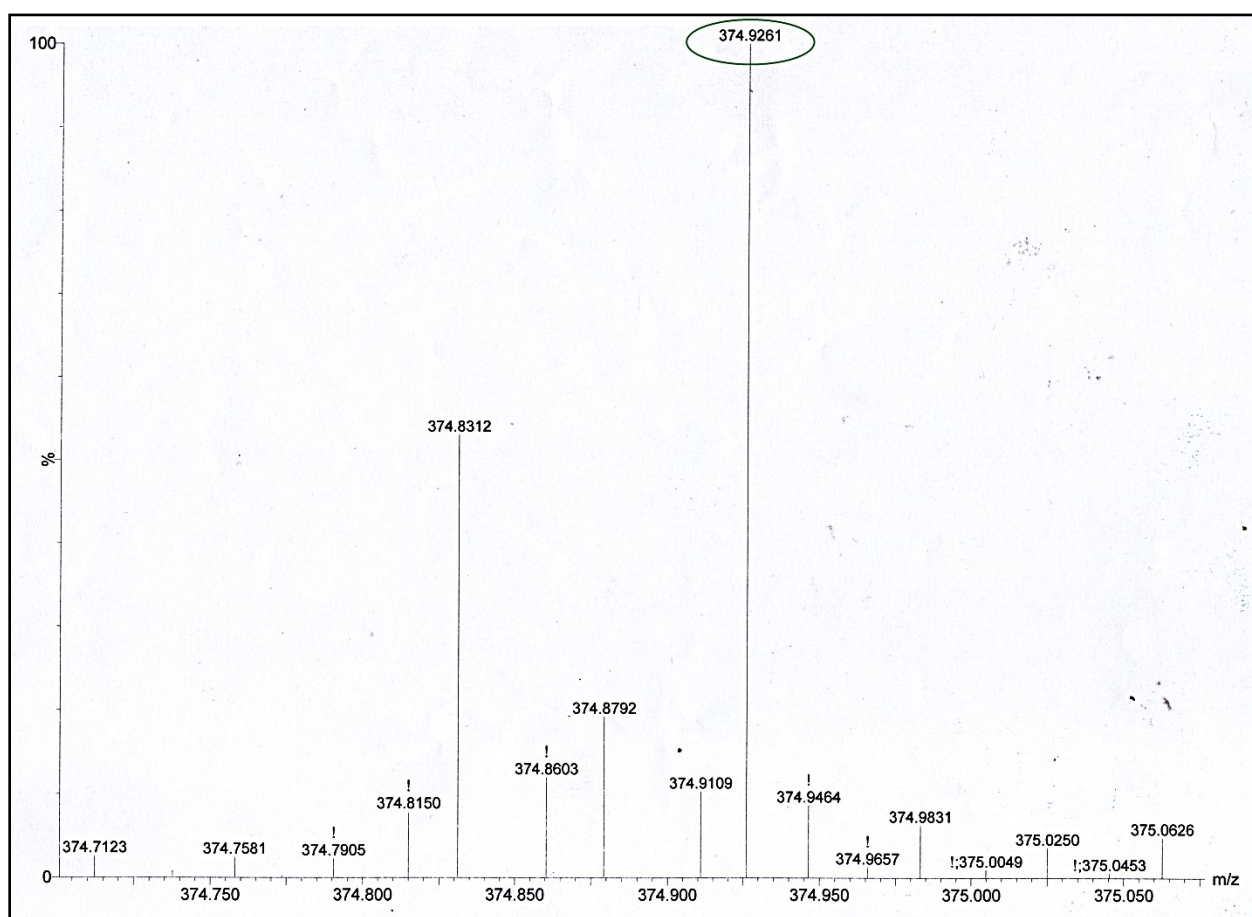

Fig. S15 Partial HRMS spectra of NADNP with H<sub>2</sub>S in MeOH.

## 11. DFT Study

**Table S3** Details of Geometry Optimization in Gaussian 09 Program.

| Details              | NADNP        | NADNP-Na <sup>+</sup> |
|----------------------|--------------|-----------------------|
| Calculation method   | B3LYP        | B3LYP                 |
| Basis set            | 6-31+G (d)   | 6-31+G (d)            |
| E (B3LYP) (a.u.)     | -1250.004713 | -1411.756065          |
| Charge, Multiplicity | 0, 1         | 0, 1                  |

**Table S4** Details of Solvent Single Point Calculation in Gaussian 09 Program.

| Details              | NADNP          | NADNP-Na <sup>+</sup> |
|----------------------|----------------|-----------------------|
| Calculation method   | B3LYP          | B3LYP                 |
| Basis set            | 6-31+G (d,p)   | 6-31+G (d,p)          |
| E(B3LYP) (a.u.)      | -1250.05654907 | -1411.81140693        |
| Charge, Multiplicity | 0, 1           | 0, 1                  |
| Solvent (SMD)        | DMSO           | DMSO                  |

### TDDFT- Calculation

**Table S5** TDDFT results of complex Probe at B3LYP/6-31+G(d,p) (SMD=DMSO)//B3LYP/6-31+G(d) level. Total no. of states in the calculation: 20.

| Complex               | $\lambda(\text{nm})^{[a]}$ | $f^{[b]}$ | $\Delta E(\text{cm}^{-1})^{[c]}$ | Transitions <sup>[d]</sup> |
|-----------------------|----------------------------|-----------|----------------------------------|----------------------------|
| NADNP                 | 482.86                     | 0.6222    | 20709.898                        | HOMO → LUMO+1 (99%)        |
| NADNP-Na <sup>+</sup> | 570.83                     | 0.4573    | 17518.36                         | HOMO → LUMO+1 (99%)        |

<sup>[a]</sup>Wavelength of the transition. <sup>[b]</sup>The oscillator strength of the transition. <sup>[c]</sup>Excitation energies for each transition. <sup>[d]</sup>Molecular orbitals involved in the transitions.

**Table S6.** Energies of HOMO and LUMO+1 (HOMO = Highest Occupied Molecular Orbital and LUMO = Lowest Unoccupied Molecular Orbital)

| Species               | $E_{\text{HOMO}}$ (a.u.) | $E_{\text{LUMO+1}}$ (a.u.) | $\Delta E$ (a.u.) | $\Delta E$ (eV) | $\Delta E$ (kcal/mol) |
|-----------------------|--------------------------|----------------------------|-------------------|-----------------|-----------------------|
| NADNP                 | -0.21146                 | -0.10492                   | 0.10654           | 2.899           | 66.9                  |
| NADNP-Na <sup>+</sup> | -0.19238                 | -0.10053                   | 0.09185           | 2.499           | 57.6                  |

**Table S7** Cartesian coordinates (in Å) of the complexes NADNP and NADNP-Na<sup>+</sup> at B3LYP/6-31+G(d) level of theory.

| <b>NADNP</b> |              |              |              |
|--------------|--------------|--------------|--------------|
| 8            | 1.122912000  | -0.419973000 | -0.157043000 |
| 6            | 2.452868000  | -0.212713000 | -0.110735000 |
| 6            | 3.026584000  | 1.074320000  | -0.068858000 |
| 6            | 2.190871000  | 2.253126000  | -0.073592000 |
| 7            | 0.890346000  | 2.203564000  | -0.116160000 |
| 7            | 0.241522000  | 3.403645000  | -0.114333000 |
| 6            | -1.112454000 | 3.499981000  | -0.155515000 |
| 6            | -1.925788000 | 2.333495000  | -0.202951000 |
| 6            | -3.299890000 | 2.412087000  | -0.245124000 |
| 6            | -3.928084000 | 3.670210000  | -0.241735000 |
| 7            | -5.386161000 | 3.751143000  | -0.286539000 |
| 8            | -6.013473000 | 2.688487000  | -0.326043000 |
| 8            | -5.904375000 | 4.869886000  | -0.282393000 |
| 6            | -3.185070000 | 4.835084000  | -0.196517000 |
| 6            | -1.790427000 | 4.763985000  | -0.153579000 |
| 7            | -1.082741000 | 6.031519000  | -0.107717000 |
| 8            | -1.732739000 | 7.074564000  | -0.109123000 |
| 8            | 0.166814000  | 6.014710000  | -0.068344000 |
| 6            | 4.472507000  | 1.193857000  | -0.020673000 |
| 6            | 5.161875000  | 2.435833000  | 0.023639000  |
| 6            | 6.542571000  | 2.494727000  | 0.068662000  |
| 6            | 7.318522000  | 1.315802000  | 0.072156000  |
| 6            | 6.683426000  | 0.092669000  | 0.029846000  |
| 6            | 5.268406000  | 0.001928000  | -0.016898000 |
| 6            | 4.623845000  | -1.268174000 | -0.060511000 |
| 6            | 3.259149000  | -1.377358000 | -0.106144000 |
| 1            | 0.666633000  | 0.455933000  | -0.155799000 |

  

|   |              |              |              |
|---|--------------|--------------|--------------|
| 1 | 2.676258000  | 3.230626000  | -0.039682000 |
| 1 | 0.764887000  | 4.280400000  | -0.081360000 |
| 1 | -1.443203000 | 1.365976000  | -0.205523000 |
| 1 | -3.904963000 | 1.513760000  | -0.280986000 |
| 1 | -3.670920000 | 5.802040000  | -0.193999000 |
| 1 | 4.615856000  | 3.372806000  | 0.023006000  |
| 1 | 7.033174000  | 3.464015000  | 0.101685000  |
| 1 | 8.402609000  | 1.374974000  | 0.107768000  |
| 1 | 7.261377000  | -0.828818000 | 0.031621000  |
| 1 | 5.239542000  | -2.164558000 | -0.057089000 |
| 1 | 2.759884000  | -2.340517000 | -0.139621000 |

  

| <b>NADNP-Na<sup>+</sup></b> |              |              |              |
|-----------------------------|--------------|--------------|--------------|
| 8                           | 1.365843000  | -0.776921000 | -0.916342000 |
| 6                           | 2.567266000  | -0.460688000 | -0.622608000 |
| 6                           | 2.983098000  | 0.876239000  | -0.250860000 |
| 6                           | 2.089743000  | 1.980448000  | -0.280279000 |
| 7                           | 0.783673000  | 1.983673000  | -0.489652000 |
| 7                           | 0.252757000  | 3.271955000  | -0.574005000 |
| 6                           | -1.043183000 | 3.508204000  | -0.299263000 |
| 6                           | -1.811842000 | 2.528136000  | 0.408273000  |
| 6                           | -3.153459000 | 2.702040000  | 0.665511000  |
| 6                           | -3.802808000 | 3.871674000  | 0.226916000  |
| 7                           | -5.225429000 | 4.044178000  | 0.483153000  |
| 8                           | -5.819084000 | 3.117214000  | 1.047364000  |
| 8                           | -5.758457000 | 5.096671000  | 0.122195000  |
| 6                           | -3.098580000 | 4.870035000  | -0.426556000 |
| 6                           | -1.737998000 | 4.707770000  | -0.687541000 |

|    |              |              |              |
|----|--------------|--------------|--------------|
| 7  | -1.074941000 | 5.789819000  | -1.384009000 |
| 8  | -1.739198000 | 6.758900000  | -1.752599000 |
| 8  | 0.154630000  | 5.692759000  | -1.587622000 |
| 6  | 4.382093000  | 1.125743000  | 0.111626000  |
| 6  | 4.874764000  | 2.372343000  | 0.579355000  |
| 6  | 6.211855000  | 2.562369000  | 0.894983000  |
| 6  | 7.138573000  | 1.511117000  | 0.776092000  |
| 6  | 6.688921000  | 0.274804000  | 0.348977000  |
| 6  | 5.330980000  | 0.060030000  | 0.020803000  |
| 6  | 4.885670000  | -1.239375000 | -0.392470000 |
| 6  | 3.582664000  | -1.490998000 | -0.688045000 |
| 11 | -0.466384000 | 0.182014000  | 1.217016000  |

|   |              |              |              |
|---|--------------|--------------|--------------|
| 1 | 2.541100000  | 2.961898000  | -0.126479000 |
| 1 | 0.772664000  | 4.018152000  | -1.035406000 |
| 1 | -1.282577000 | 1.681056000  | 0.831074000  |
| 1 | -3.714250000 | 1.964090000  | 1.227921000  |
| 1 | -3.595987000 | 5.777541000  | -0.744344000 |
| 1 | 4.206552000  | 3.214639000  | 0.722775000  |
| 1 | 6.539762000  | 3.536992000  | 1.248201000  |
| 1 | 8.184330000  | 1.665862000  | 1.026565000  |
| 1 | 7.380141000  | -0.561226000 | 0.262628000  |
| 1 | 5.623615000  | -2.037536000 | -0.455429000 |
| 1 | 3.245664000  | -2.478563000 | -0.990054000 |

## 12. Quantitative analysis of Arsenite , Arsenate and H<sub>2</sub>S in water sample:

For the quantitative analysis ,water samples were collected from ground level sources and unused well. Unknown concentrations of arsenite, arsenate, and H<sub>2</sub>S were spiked into these water samples in equal volumes (300μL) to prepare artificial arsenite, arsenate, and H<sub>2</sub>S contaminated water, respectively.

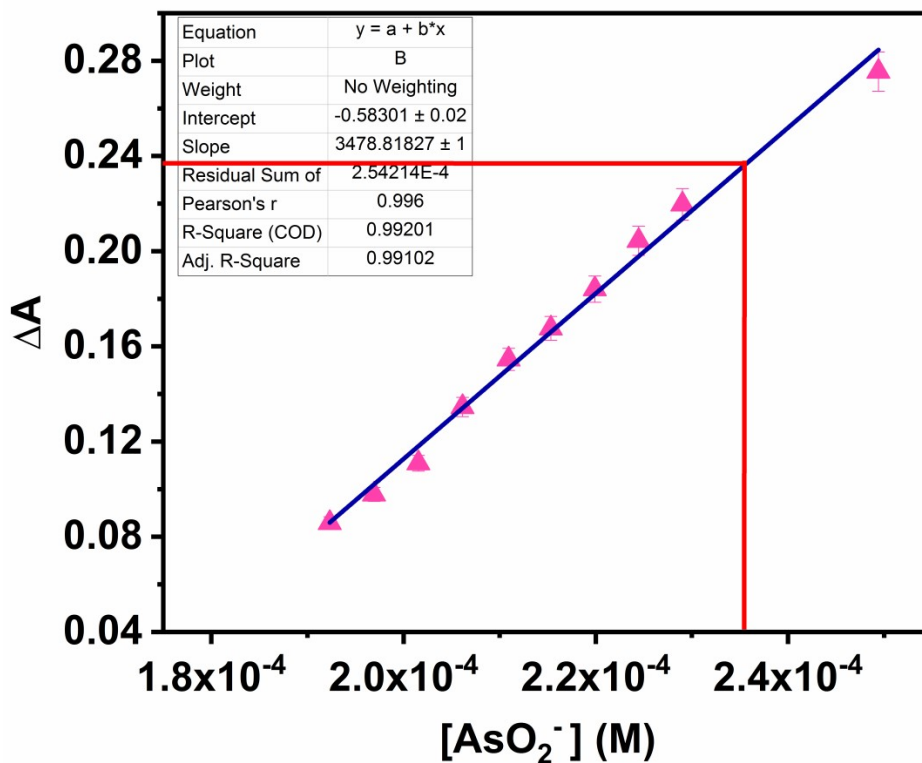

**Fig. S16** Estimation of unknown concentration ( $2.35 \times 10^{-4}$  M) of Arsenite (red line) in artificially arsenite contaminated ground level water from the standard absorbance curve.

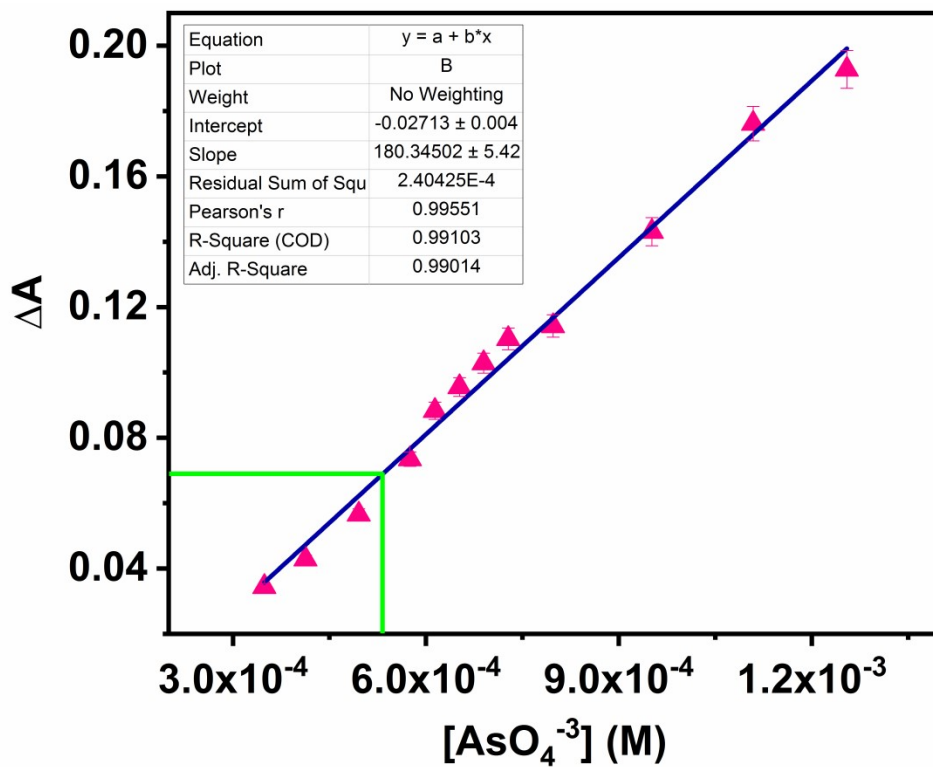

**Fig. S17** Estimation of unknown concentration ( $5.32 \times 10^{-4}$  M) of Arsenate (green line) in artificially arsenate contaminated ground level water from the standard absorbance curve.



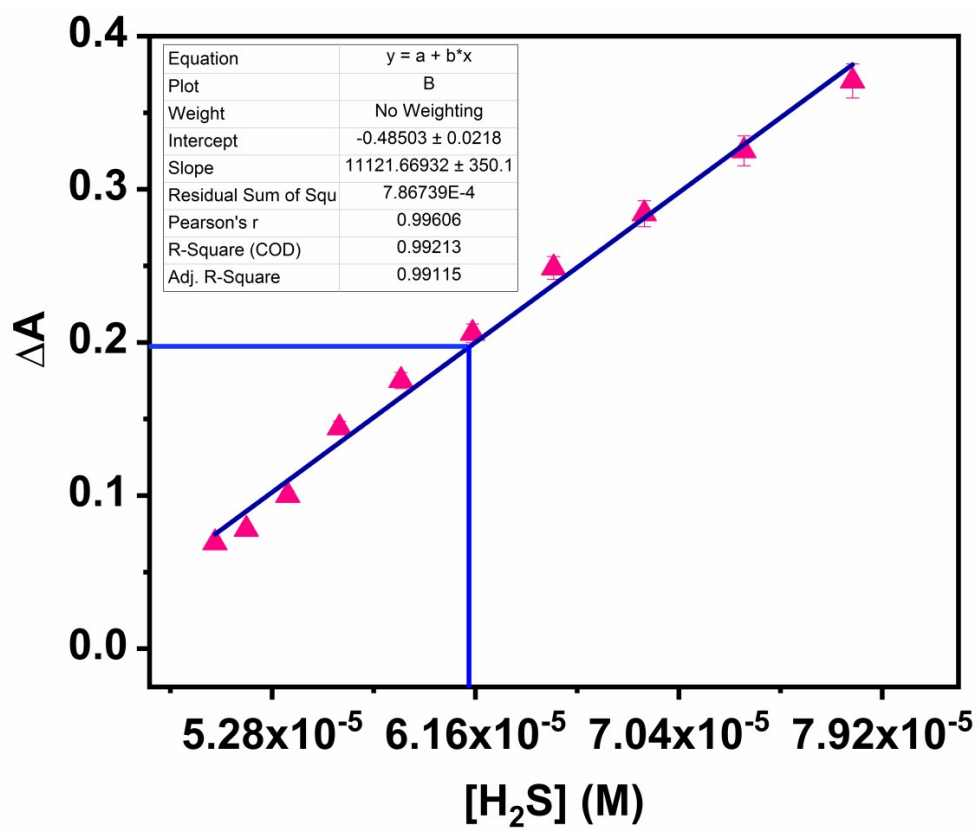

**Fig. S18** Estimation of unknown concentration ( $6.13 \times 10^{-5}$  M) of  $H_2S$  (blue line) in artificially  $H_2S$  contaminated water of unused well from the standard absorbance curve.

| Concentration of probe solution | Volume of spiked H <sub>2</sub> S solution of unknown strength with the unknown contaminated sample | Images of paper strips                                                             | Concentration of H <sub>2</sub> S |
|---------------------------------|-----------------------------------------------------------------------------------------------------|------------------------------------------------------------------------------------|-----------------------------------|
| 10 μM                           | 500 μL                                                                                              |  | $6.70 \times 10^{-5} \text{ M}$   |
| 10 μM                           | 300 μL                                                                                              |  | $6.13 \times 10^{-5} \text{ M}$   |
| 10 μM                           | 200 μL                                                                                              |  | $5.92 \times 10^{-5} \text{ M}$   |

**13. Statistic evaluation of the paper strip:**

**Table S3.** Statistic evaluation of the paper strip

| Concentration of probe solution | Volume of spiked arsenite solution of unknown strength with the unknown contaminated sample | Images of paper strips                                                             | Concentration of arsenite       |
|---------------------------------|---------------------------------------------------------------------------------------------|------------------------------------------------------------------------------------|---------------------------------|
| 10 $\mu\text{M}$                | 500 $\mu\text{L}$                                                                           |  | $2.42 \times 10^{-4} \text{ M}$ |
| 10 $\mu\text{M}$                | 300 $\mu\text{L}$                                                                           |  | $2.35 \times 10^{-4} \text{ M}$ |
| 10 $\mu\text{M}$                | 200 $\mu\text{L}$                                                                           |  | $2.25 \times 10^{-4} \text{ M}$ |

#### 14. Spiked recovery experiment:

**Table S4.** Determination of  $\text{H}_2\text{S}$  in tap water samples with the probe NADNP.

| Sample       | Added $\text{H}_2\text{S}$ ( $\mu\text{M}$ ) | Found $\text{H}_2\text{S}$ ( $\mu\text{M}$ ) | Recovery (%) |
|--------------|----------------------------------------------|----------------------------------------------|--------------|
| Ground Water | 10                                           | $9.8 \pm 0.2$                                | 98           |
|              | 15                                           | $14.8 \pm 0.3$                               | 98.6         |

<sup>a</sup> Standard deviation calculation for three measurements.

**Table S5.** Determination of  $\text{AsO}_2^-$  in tap water samples with the probe NADNP.

| Sample       | Added $\text{AsO}_2^-$ ( $\mu\text{M}$ ) | Found $\text{AsO}_2^-$ ( $\mu\text{M}$ ) | Recovery (%) |
|--------------|------------------------------------------|------------------------------------------|--------------|
| Ground Water | 10                                       | $9.4 \pm 0.3$                            | 94           |
|              | 15                                       | $14.7 \pm 0.3$                           | 98           |

<sup>a</sup> Standard deviation calculation for three measurements.

| Concentration of probe solution | Volume of spiked solution of unknown strength with the unknown contaminated sample | Images of paper strips                                                            | Images of solutions                                                                 | Concentration of H <sub>2</sub> S |
|---------------------------------|------------------------------------------------------------------------------------|-----------------------------------------------------------------------------------|-------------------------------------------------------------------------------------|-----------------------------------|
| 10 μM                           | 500 μL                                                                             |  |  | $6.70 \times 10^{-5} \text{ M}$   |
| 10 μM                           | 300 μL                                                                             |  |  | $6.13 \times 10^{-5} \text{ M}$   |

|                                        |                                                                                                    |                                                                                     |                                                                                      |                                  |
|----------------------------------------|----------------------------------------------------------------------------------------------------|-------------------------------------------------------------------------------------|--------------------------------------------------------------------------------------|----------------------------------|
| 10 $\mu$ M                             | 200 $\mu$ L                                                                                        |    |    | $5.92 \times 10^{-5}$ M          |
| <b>Concentration of probe solution</b> | <b>Volume of spiked arsenite solution of unknown strength with the unknown contaminated sample</b> | <b>Images of paper strips</b>                                                       | <b>Images of solutions</b>                                                           | <b>Concentration of arsenite</b> |
| 10 $\mu$ M                             | 500 $\mu$ L                                                                                        |   |   | $2.42 \times 10^{-4}$ M          |
| 10 $\mu$ M                             | 300 $\mu$ L                                                                                        |   |   | $2.35 \times 10^{-4}$ M          |
| 10 $\mu$ M                             | 200 $\mu$ L                                                                                        |  |  | $2.25 \times 10^{-4}$ M          |

### 15. Sensor Sensitivity between solutions and paper strips:

**Table S6.** Sensor Sensitivity between solutions and paper strips.
